# Supplementary material
Source: PubMed Central journal article supplement (PMC6874763)
Supplement: NIHMS1538873-supplement-1.pdf [file NIHMS1538873-supplement-1.pdf]

**Supplemental Figure Legend.**

**Figure S1, related to Figure 1.** The location of a single AG dinucleotide within a poly r(U) track promotes rocaglate-stimulated eIF4A1:RNA binding. The RNA sequences used in this experiment are indicated to the left and the FP results obtained with these are plotted to the right. eIF4A1:RNA binding assays were performed in the presence of vehicle or 50  $\mu$ M CR-1-31-B.  $n = 4 \pm$  SEM.

AG)<sub>8</sub>: AGAGAGAGAGAGAGAG  
 Poly(U): UUUUUUUUUUUUUUUUU  
 FAM 1: AGUUUUUUUUUUUUUUUU  
 FAM 3: UUAGUUUUUUUUUUUUUU  
 FAM 5: UUUUAGUUUUUUUUUUUU  
 FAM 7: UUUUUUAGUUUUUUUUUU  
 FAM 9: UUUUUUUAGUUUUUUUU  
 FAM 11: UUUUUUUUAGUUUUUUUU  
 FAM 13: UUUUUUUUUUAGUUUUUU  
 FAM 15: UUUUUUUUUUUUAGUUUU  
 FAM 17: UUUUUUUUUUUUUUAG

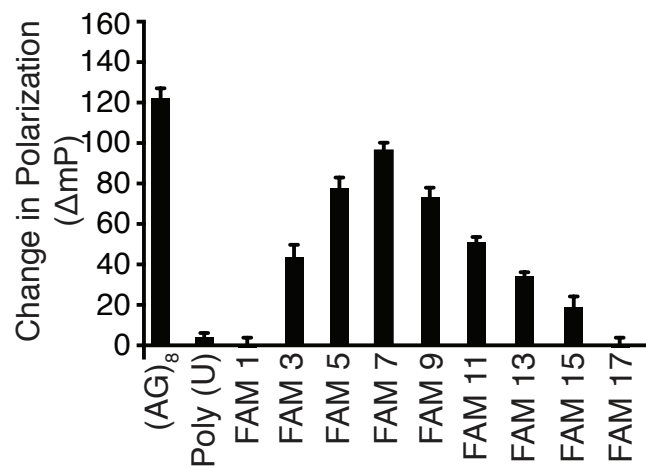

**Figure S1**
